# Supplementary material for: Structural mechanisms of TRPM7 activation and inhibition
Source: Springer Nature journal article supplement (doi:10.1038/s41467-023-38362-3), 2023-05-08
Supplement: MOESM1 [file 41467_2023_38362_MOESM1_ESM.pdf]

# Supplementary Information

## Structural mechanisms of TRPM7 activation and inhibition

Kirill D. Nadezhdin<sup>1</sup>, Leonor Correia<sup>2</sup>, Chamali Narangoda<sup>3</sup>, Dhilon S. Patel<sup>3</sup>, Arthur Neuberger<sup>1</sup>, Thomas Gudermann<sup>2,4</sup>, Maria G. Kurnikova<sup>3,\*</sup>, Vladimir Chubanov<sup>2,\*</sup>, and Alexander I. Sobolevsky<sup>1,\*</sup>

<sup>1</sup>Department of Biochemistry and Molecular Biophysics, Columbia University, New York, NY, USA

<sup>2</sup>Walther-Straub Institute of Pharmacology and Toxicology, LMU Munich, Munich, Germany

<sup>3</sup>Chemistry Department, Carnegie Mellon University, Pittsburgh, PA, USA

<sup>4</sup>Comprehensive Pneumology Center, German Center for Lung Research (DZL), Munich, Germany

\*Corresponding authors: M.G.K. ([kurnikova@cmu.edu](mailto:kurnikova@cmu.edu)), V.C. ([vladimir.chubanov@lrz.uni-muenchen.de](mailto:vladimir.chubanov@lrz.uni-muenchen.de)) or A.I.S. ([as4005@cumc.columbia.edu](mailto:as4005@cumc.columbia.edu))

### **This PDF file includes:**

Supplementary Figures 1-10

Supplementary Tables 1-4

Reference

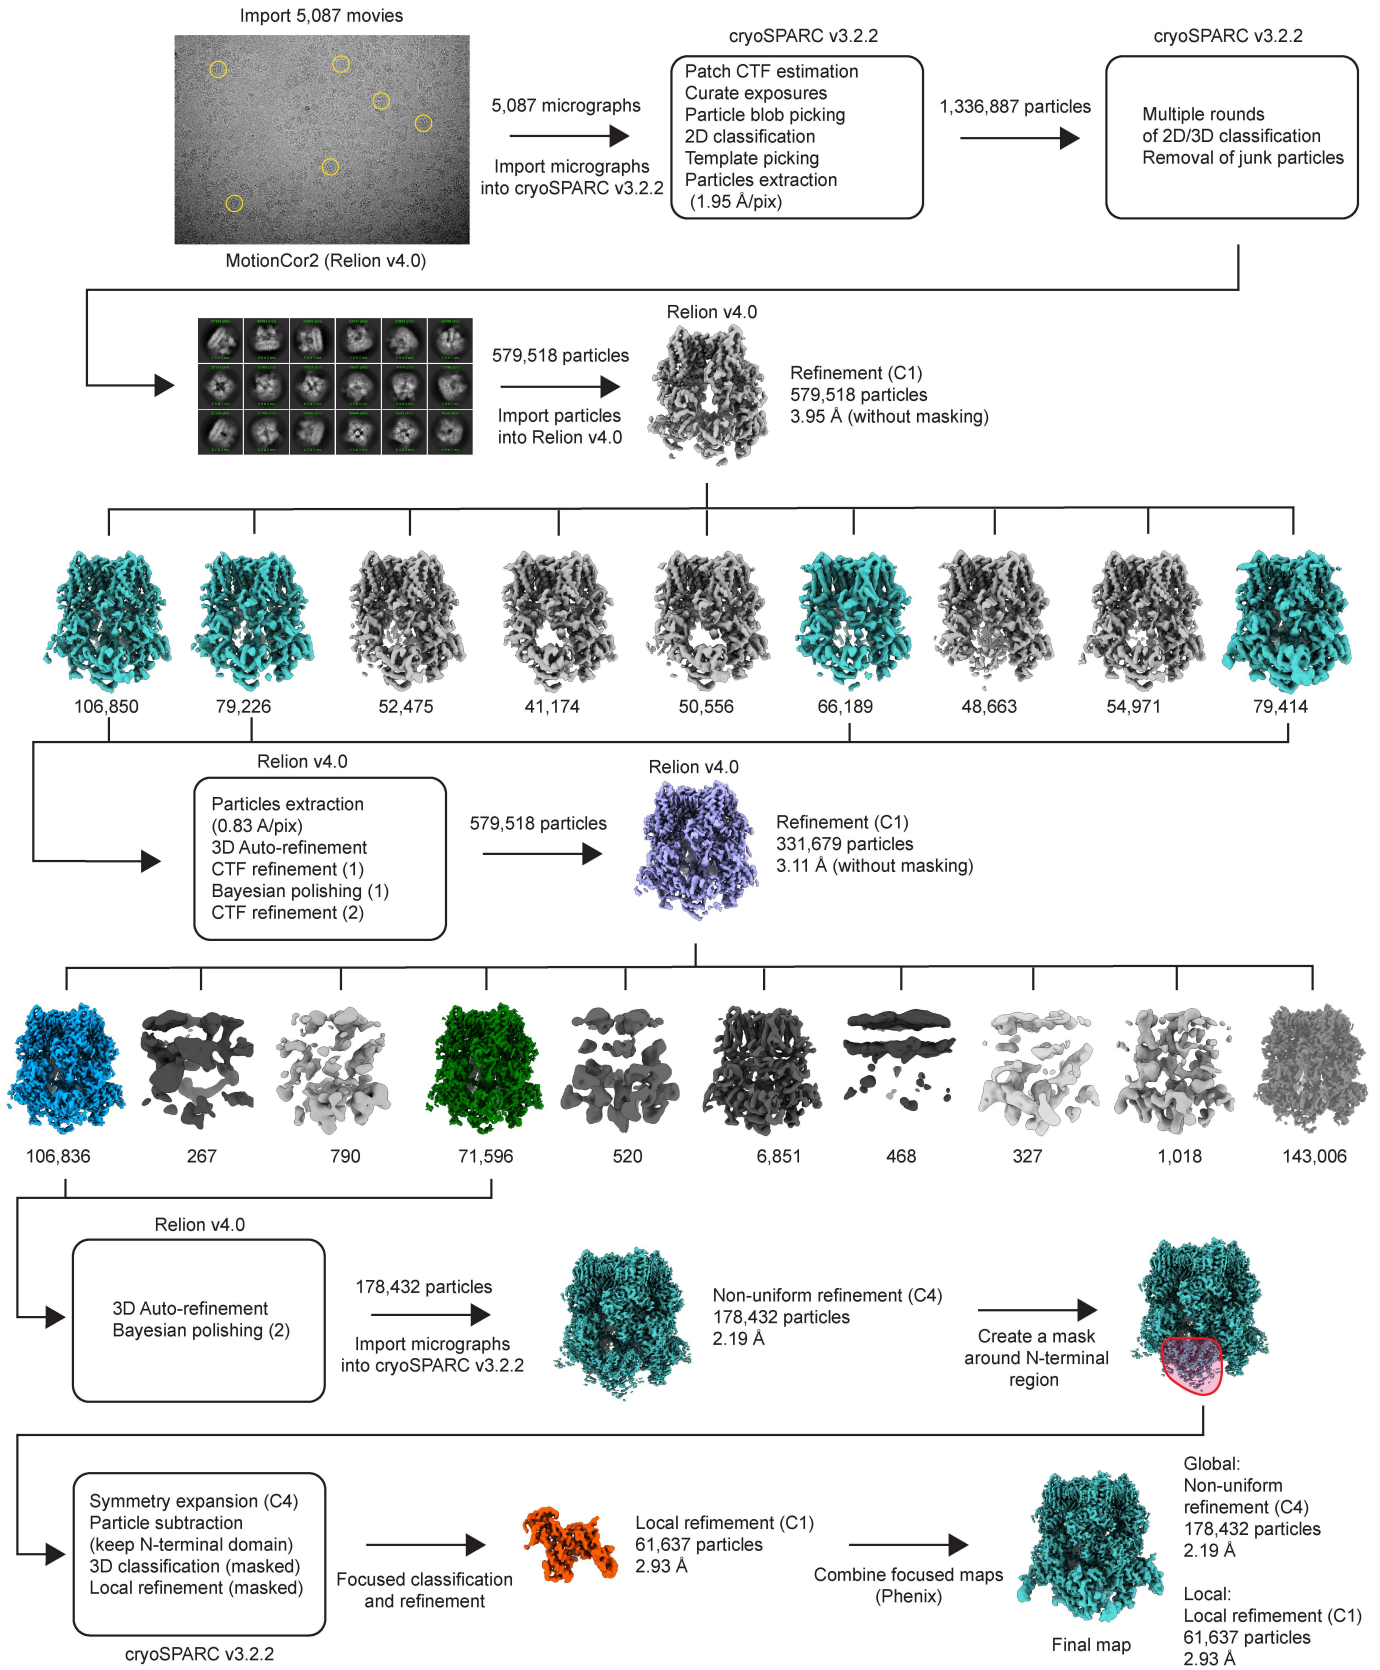

**Supplementary Fig. 1 | Cryo-EM data processing workflow.** The cryo-EM processing workflow is illustrated for the 2.19-Å resolution TRPM7<sub>Closed</sub> structure.

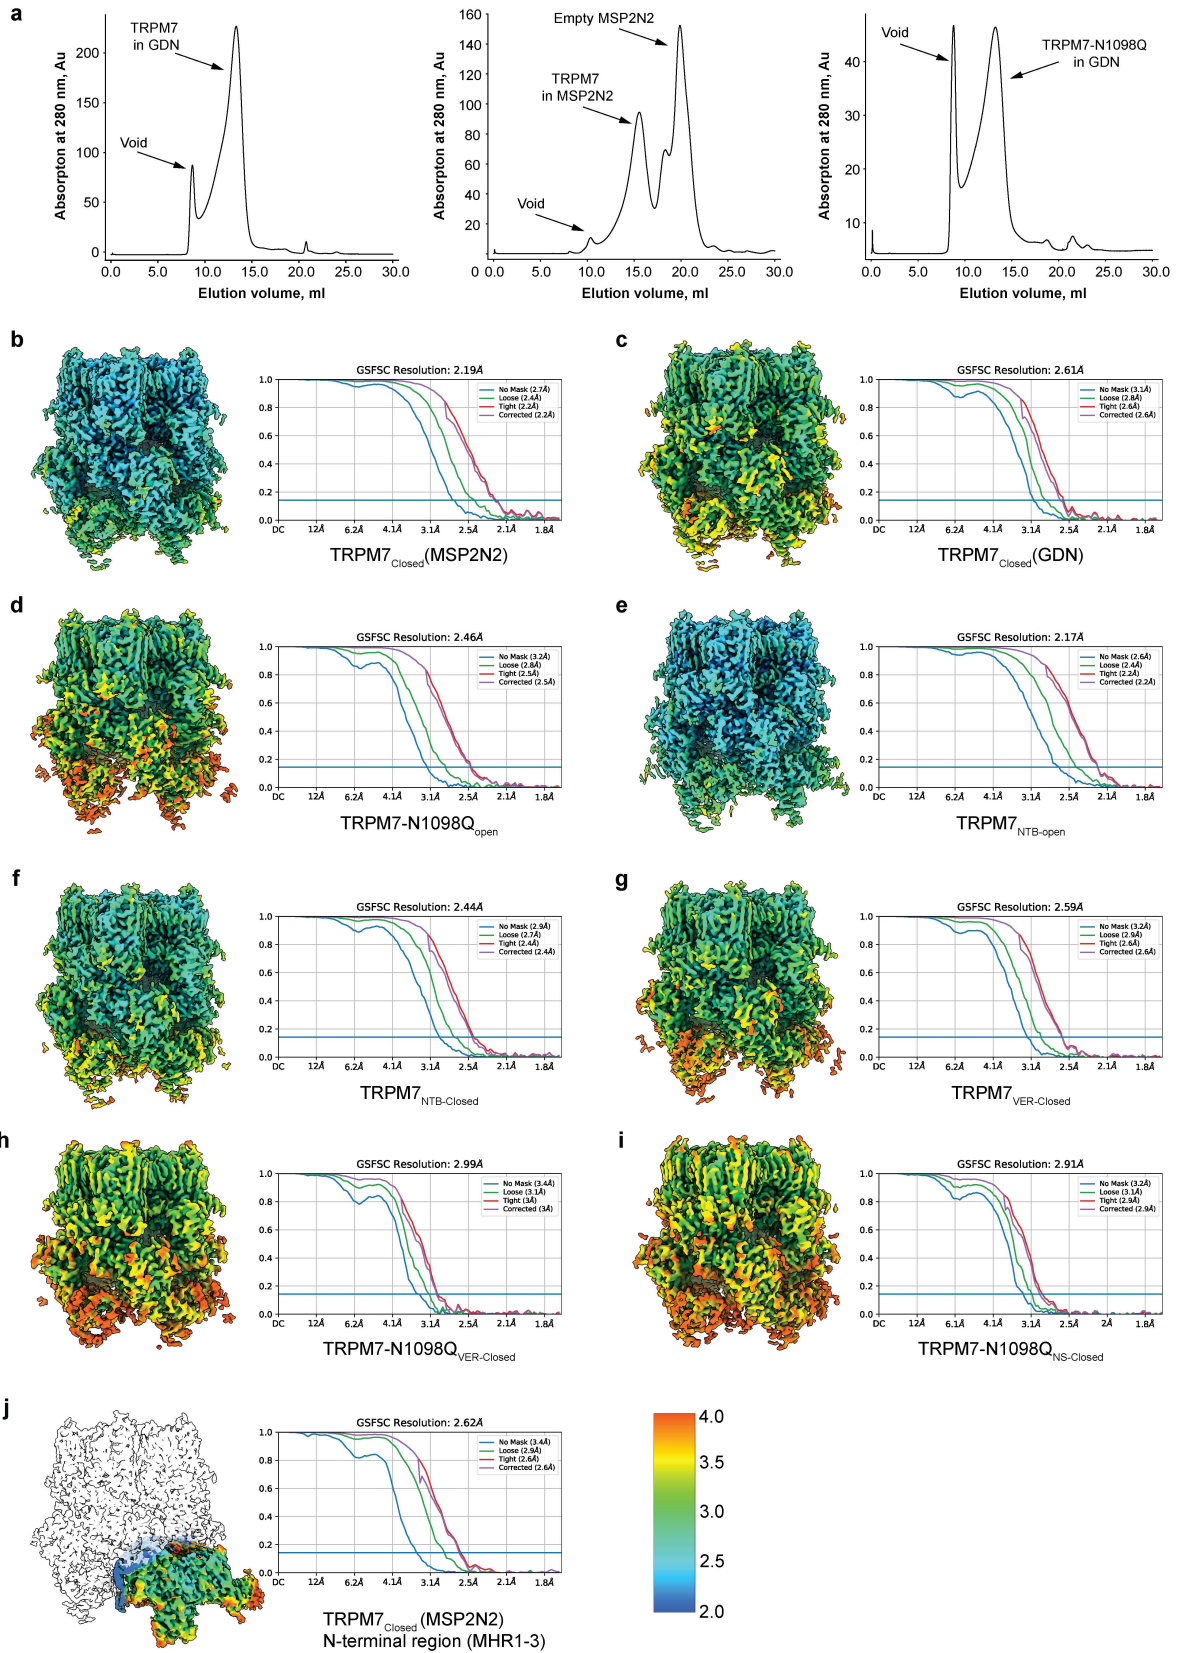

**Supplementary Fig. 2 | Characteristics of Cryo-EM reconstructions.** **a** SEC profiles for TRPM7 purified in 0.01% GDN (left), TRPM7 reconstituted in MSP2N2 nanodiscs (middle), and TRPM7-N1098Q purified in 0.01% GDN (right). **b-j** Cryo-EM maps colored according to the local resolution estimation in cryoSPARC<sup>61</sup> (left) and FSC curves calculated between half maps, with the overall resolution estimated using the FSC = 0.143 criterion<sup>80</sup> (right).



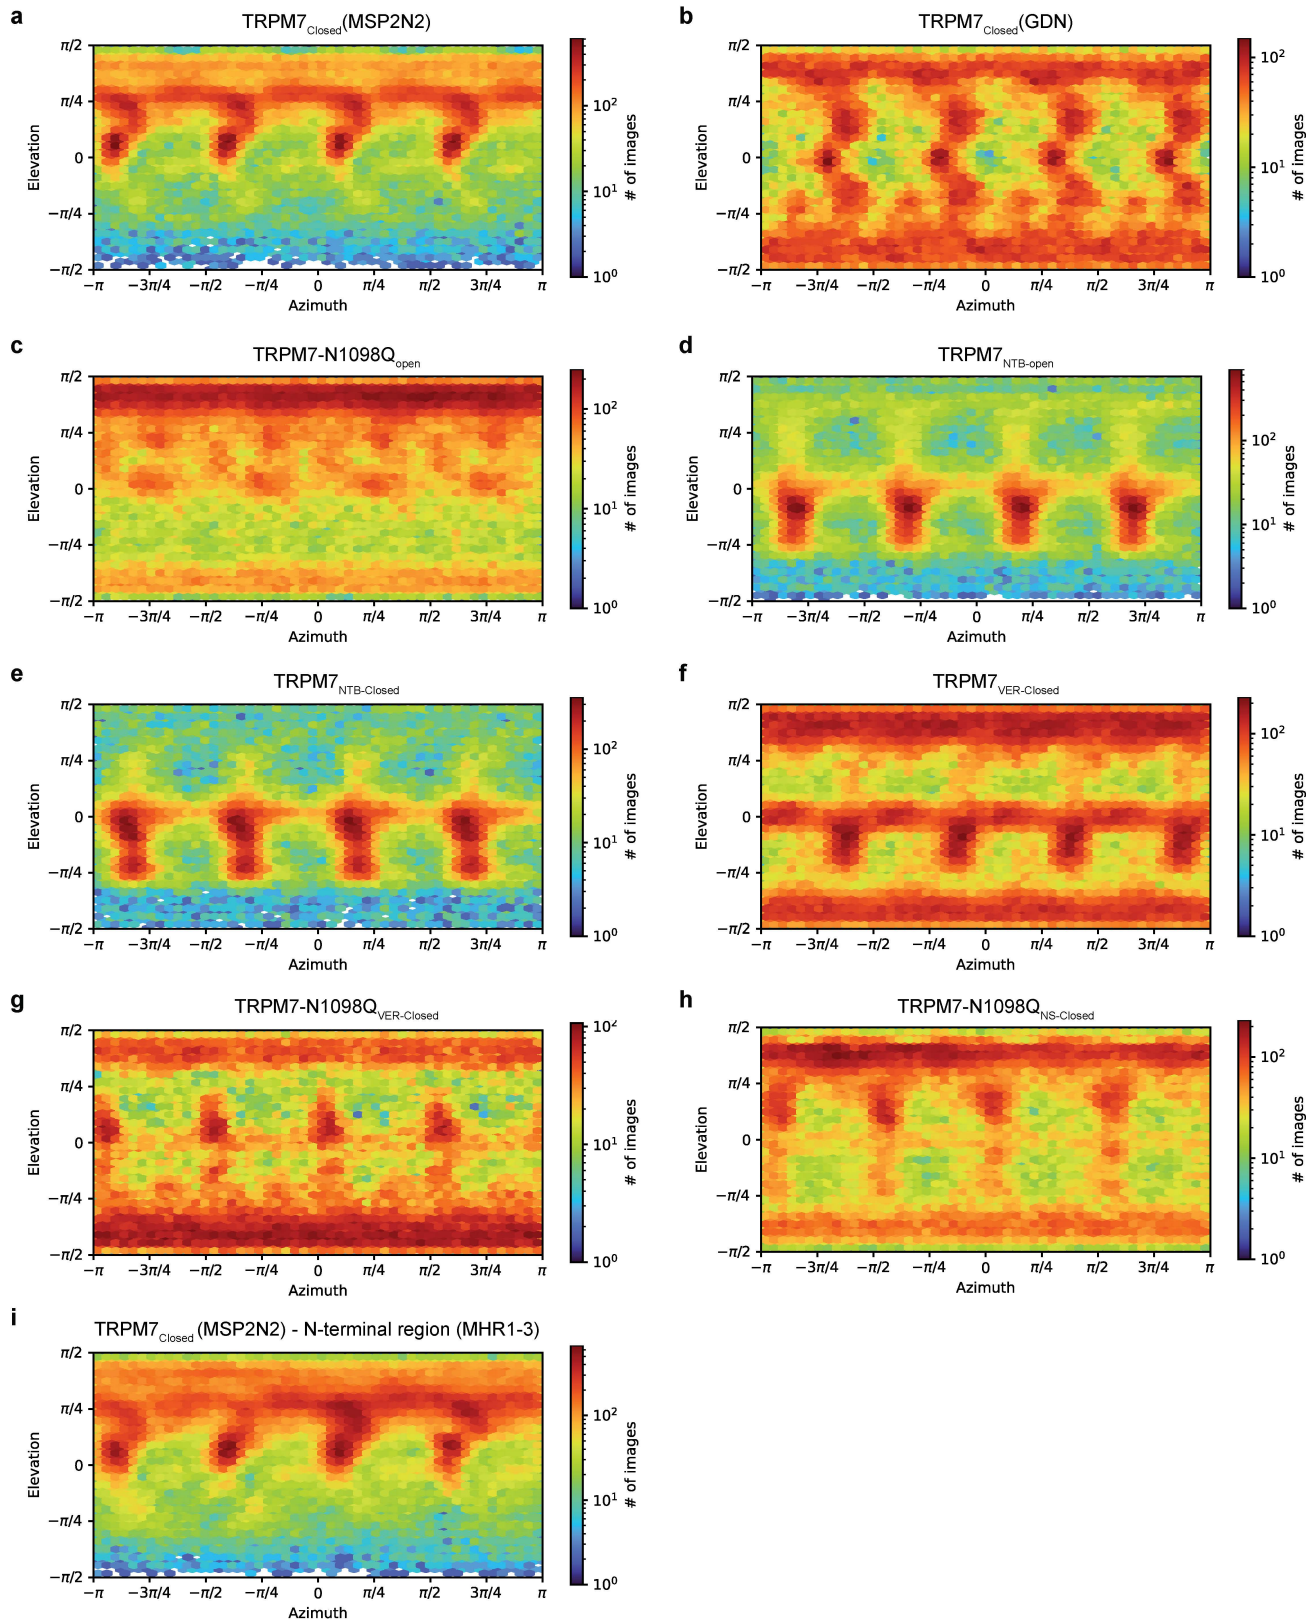

**Supplementary Fig. 3 | Distribution of particle orientations contributing to the final cryo-EM reconstructions.**  
**a-i** Angular distribution of particles calculated by cryoSPARC 3D Refinement reconstruction algorithm for TRPM7<sub>closed</sub> in MSP2N2 nanodiscs (**a**), TRPM7<sub>closed</sub> in GDN (**b**), TRPM7-N1098Q<sub>open</sub> (**c**), TRPM7<sub>NTb-open</sub> (**d**), TRPM7<sub>NTb-closed</sub> (**e**), TRPM7<sub>VER-closed</sub> (**f**), TRPM7-N1098Q<sub>VER-closed</sub> (**g**), TRPM7-N1098Q<sub>NS-closed</sub> (**h**), and TRPM7 MHR1-3 domain (**i**).



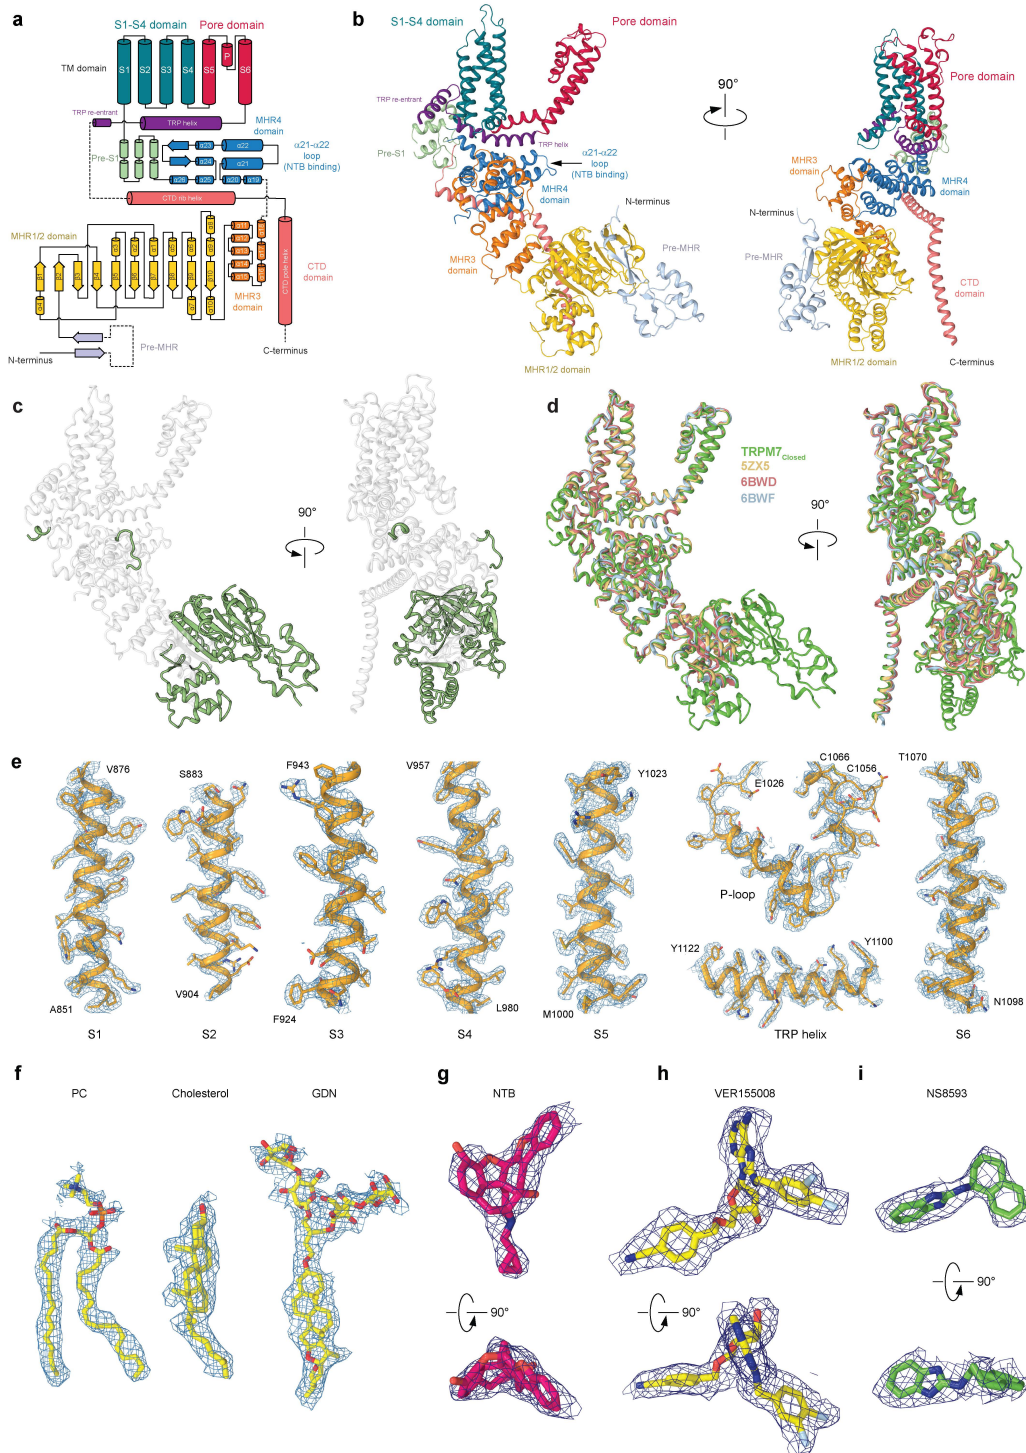

**Supplementary Fig. 4 | Overall architecture of the TRPM7 subunit, comparison with previously published structures and examples of cryo-EM density.** **a** TRPM7 subunit topology diagram colored according to domain organization. **b** Cartoon representation of TRPM7 subunit colored according to the domain organization. **c** *De novo* built structural elements in the single subunit of TRPM7<sub>Closed</sub> (green), with the previously resolved regions (PDB IDs: 5ZX5) shown in grey. **d** Structural alignment of a single subunit from TRPM7<sub>Closed</sub> in nanodisc (green) and published structures in detergent (yellow, PDB ID: 5ZX5; red, PDB ID: 6BWD; blue, PDB ID: 6BWF)<sup>42</sup>. **e** Fragments of the TRPM7<sub>Closed</sub> TMD with the structural model shown as a ribbon and sticks and the corresponding cryo-EM density as a blue mesh. **f** Representative densities (blue mesh) for lipids phosphatidylcholine (PC), cholesterol, and detergent glycol-diosgenin (GDN) shown in sticks (yellow). **g-i** Representative densities (blue mesh) for TRPM7 ligands naltriben (NTB) (**g**), VER155008 (**h**), and NS8593 (**i**) shown in sticks (pink, yellow and green, respectively).

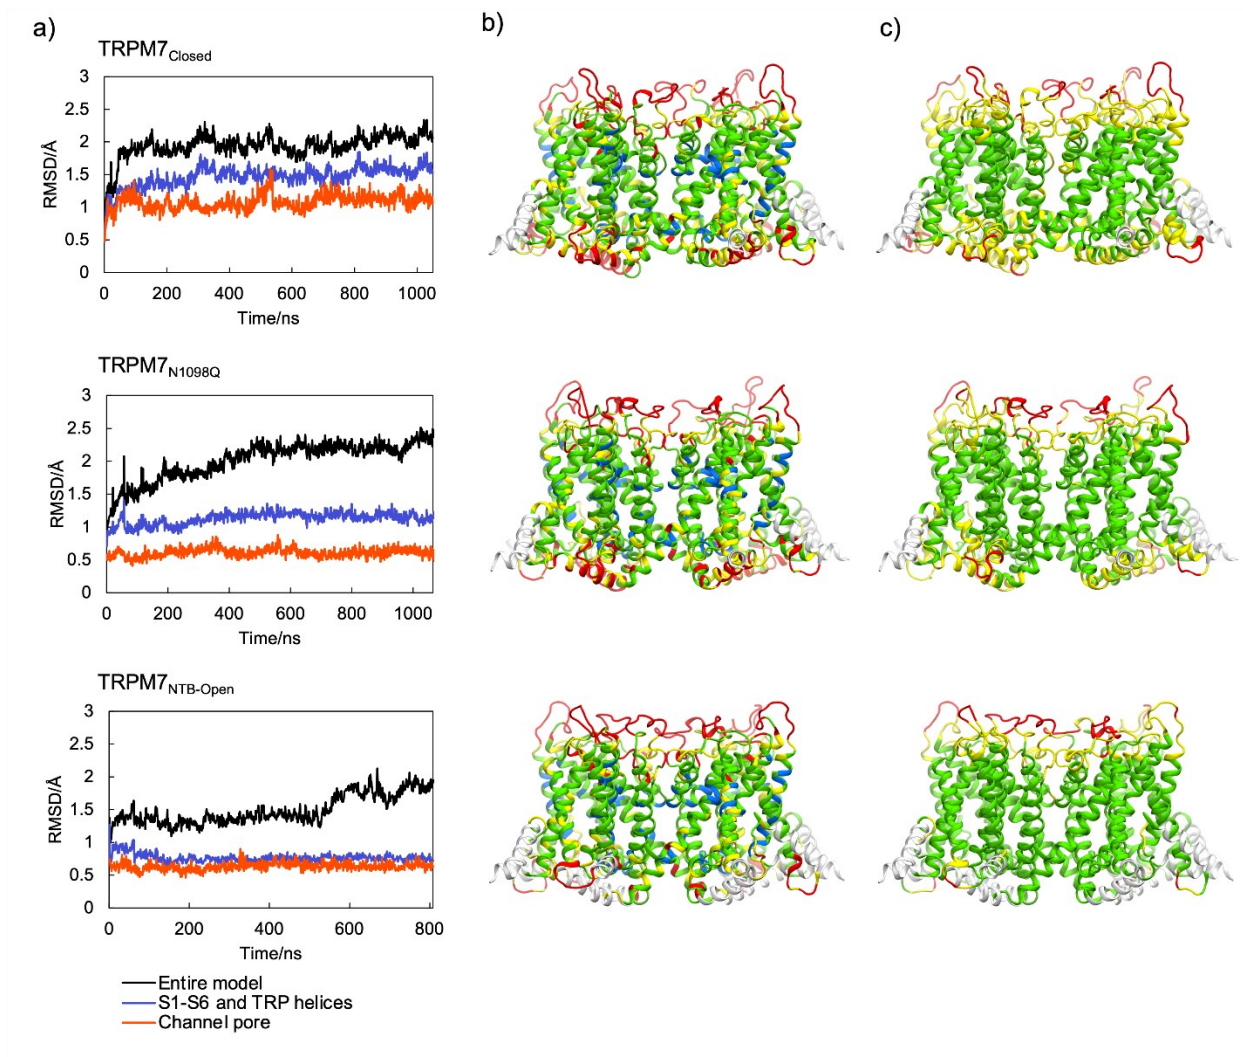

**Supplementary Fig. 5 | Protein stability during MD simulations.** **a** Root-mean-square deviation (r.m.s.d) from the initial structures in the production runs of representative systems of TRPM7<sub>closed</sub>, TRPM7-N1098Q, and TRPM7<sub>NTb-open</sub>. For each system, C $\alpha$  r.m.s.d of the entire model (black), S1-S6 and TRP helices (blue), and channel pore (orange) are shown. See **Supplementary Table 2** for the simulation information. **b** Average r.m.s.d per residue for representative systems. The backbone is colored by RMSD (blue: r.m.s.d < 1 Å, green: 1.0 Å ≤ r.m.s.d < 2.0 Å, yellow: 2.0 Å ≤ r.m.s.d < 3.0 Å, red: r.m.s.d ≥ 3.0 Å). Protein residues that were positionally restrained in the simulation are colored in white. **c** Root-mean-square fluctuation (r.m.s.f.) per residue for representative systems. The backbone is colored by r.m.s.f. (green: r.m.s.f. < 1.0 Å, yellow: 1.0 Å ≤ r.m.s.f. < 2.0 Å, red: r.m.s.f. ≥ 2.0 Å). Protein residues that were positionally restrained in the simulation are colored in white.



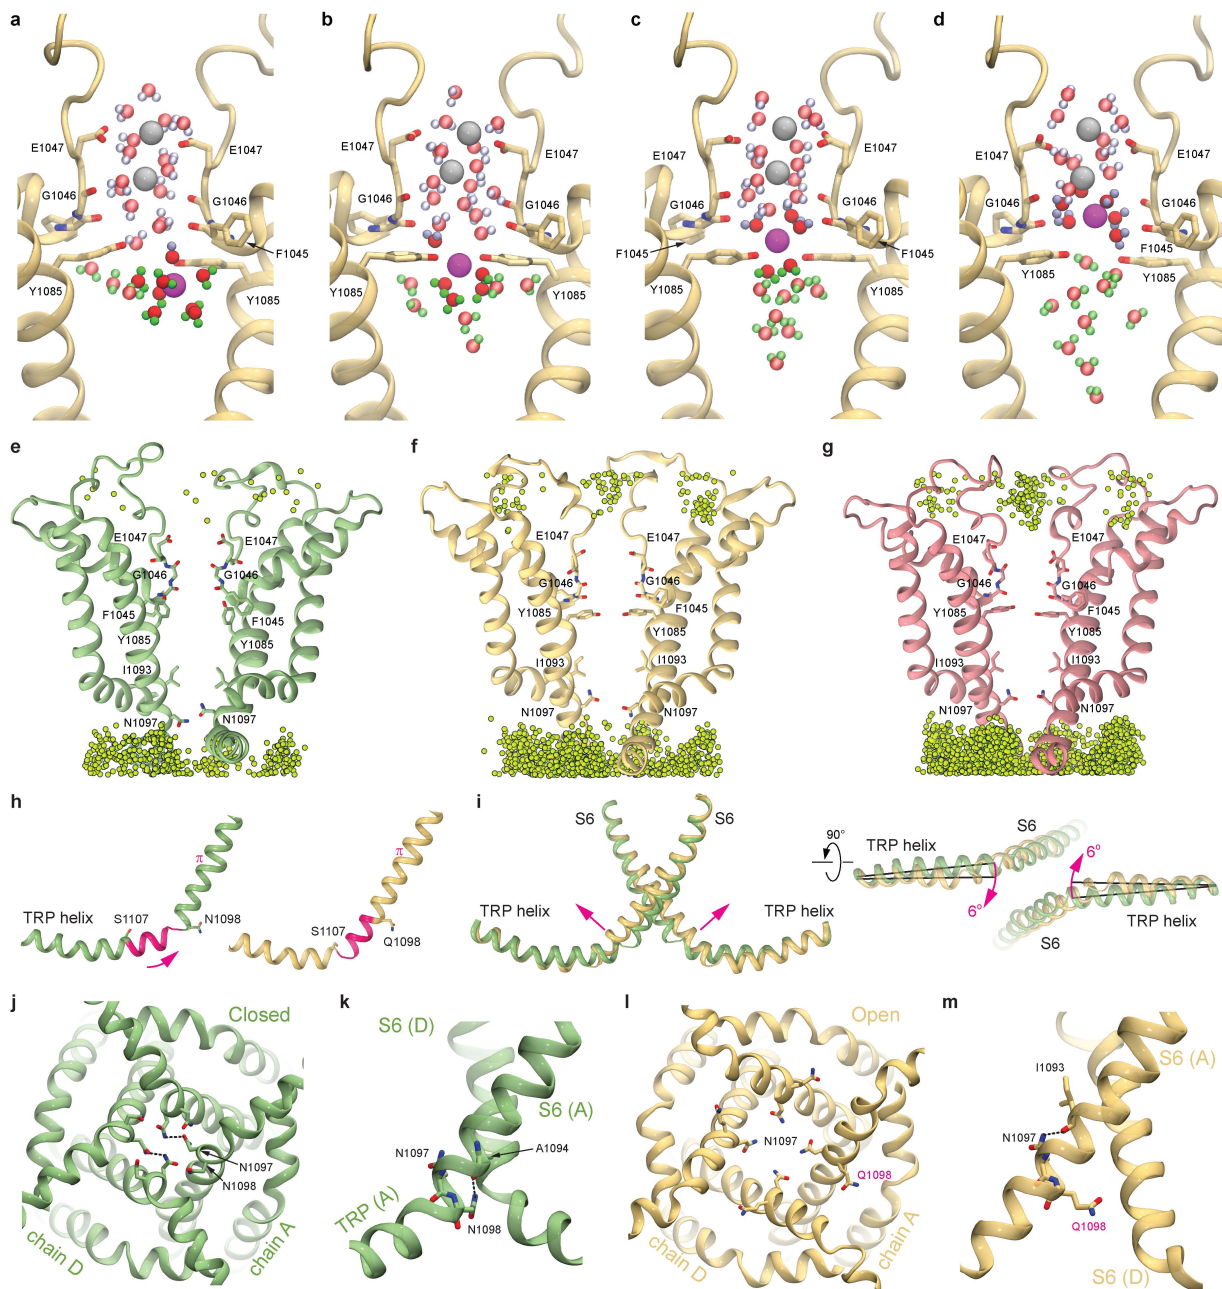

**Supplementary Fig. 6 | Role of select residues in TRPM7 ion permeation and gating highlighted by MD simulations.** **a-d** K<sup>+</sup> ion position during its permeation through TRPM7-N1098Q<sub>open</sub> channel and interaction with the Y1085 side chain before (**a-b**) and after (**c-d**) entering the selectivity filter (E1047, G1046). K<sup>+</sup> ions are shown as pink and grey balls. Water molecules initially located above and below Y1085 residues are shown as red spheres with differently colored hydrogens. Water does not cross the constriction formed by the Y1085 residues during ion permeation in the majority of simulations. **e-g** Cumulative distribution of Cl<sup>-</sup> ions (green spheres) in the MD simulations of TRPM7<sub>closed</sub> channel with no applied voltage (**e**), TRPM7-N1098Q<sub>open</sub> channel under applied voltage (**f**), and TRPM7<sub>NTB-open</sub> channel under applied voltage (**g**). **h** S6 and TRP helix, with the region undergoing the two helical-turn exchange during gating highlighted in pink. The pink arrow shows the direction of exchange between TRPM7<sub>closed</sub> and TRPM7-N1098Q<sub>open</sub> structures. **i** Superposition of S6 and TRP helices in two diagonal subunits of TRPM7<sub>closed</sub> (green) and TRPM7-N1098Q<sub>open</sub> (yellow), with the other two subunits removed for clarity. The pink arrows indicate structural rearrangements. **j-k** Close-up views of the TRPM7<sub>closed</sub> channel intracellular entrance (**j**) and S6-TRP helix regions in the neighboring subunits (**k**), with the unique closed state-stabilizing hydrogen bonds, which were not present in the open state, indicated by dashed lines and residues contributing to their formation shown as sticks. **l-m** Close-up views of the TRPM7-N1098Q<sub>open</sub> channel intracellular entrance (**l**) and S6-TRP helix regions in the neighboring subunits (**m**), with the unique open state-stabilizing hydrogen bonds indicated by dashed lines.



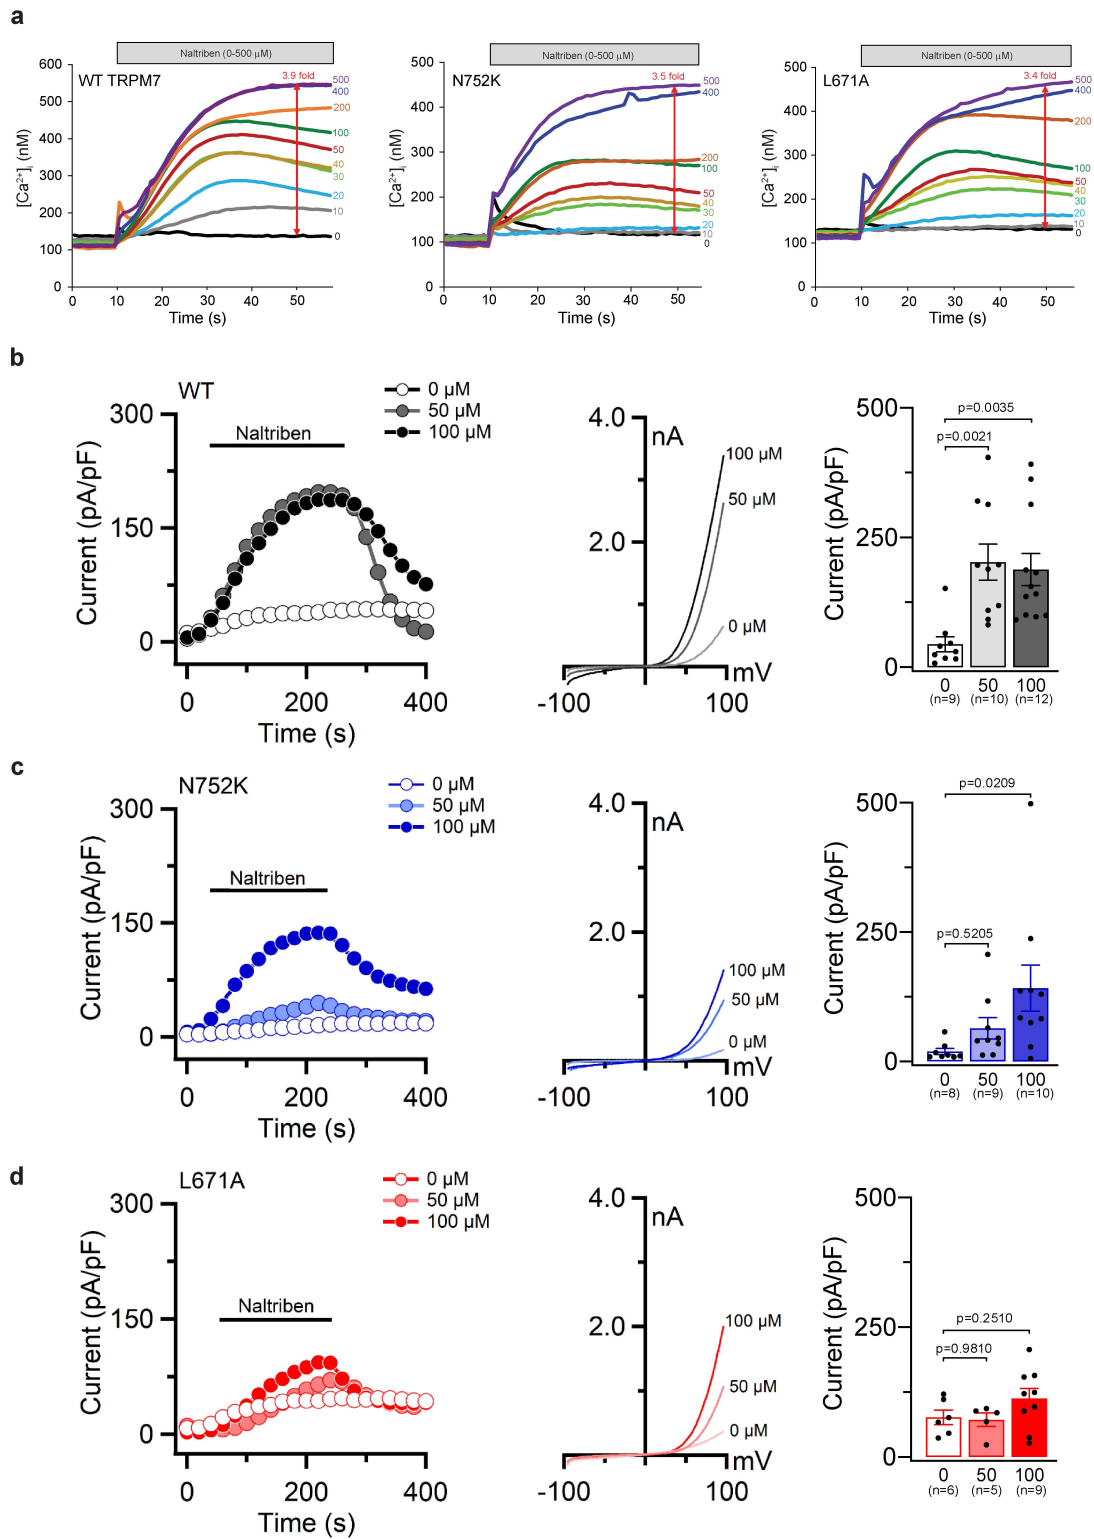

**Supplementary Fig. 7 | Activation of wild-type and mutant TRPM7 currents by naltriben.** **a** Representative measurements of NTB-stimulated  $\text{Ca}^{2+}$  influx in HEK 293T cells expressing wild-type (WT) and mutant TRPM7 channels. **b-d** Whole-cell currents were measured in HEK 293T cells expressing WT (**b**), N752K (**c**) and L671A (**d**) variants of TRPM7. *Left panels* show representative current amplitudes measured at +80 mV using the standard external solution without and with 50  $\mu\text{M}$  or 100  $\mu\text{M}$  NTB as indicated by the black bars. *Middle panels* show representative current-voltage ( $I-V$ ) relationships obtained at 230 s in the *left panels*. *Right panels* show current amplitudes at +80 mV (mean  $\pm$  SEM) obtained at 230 s as exemplified in the *left panels*.  $n$ , number of cells measured. Statistical comparisons were made using ordinary one-way ANOVA. Significance was accepted at  $p \leq 0.05$ .

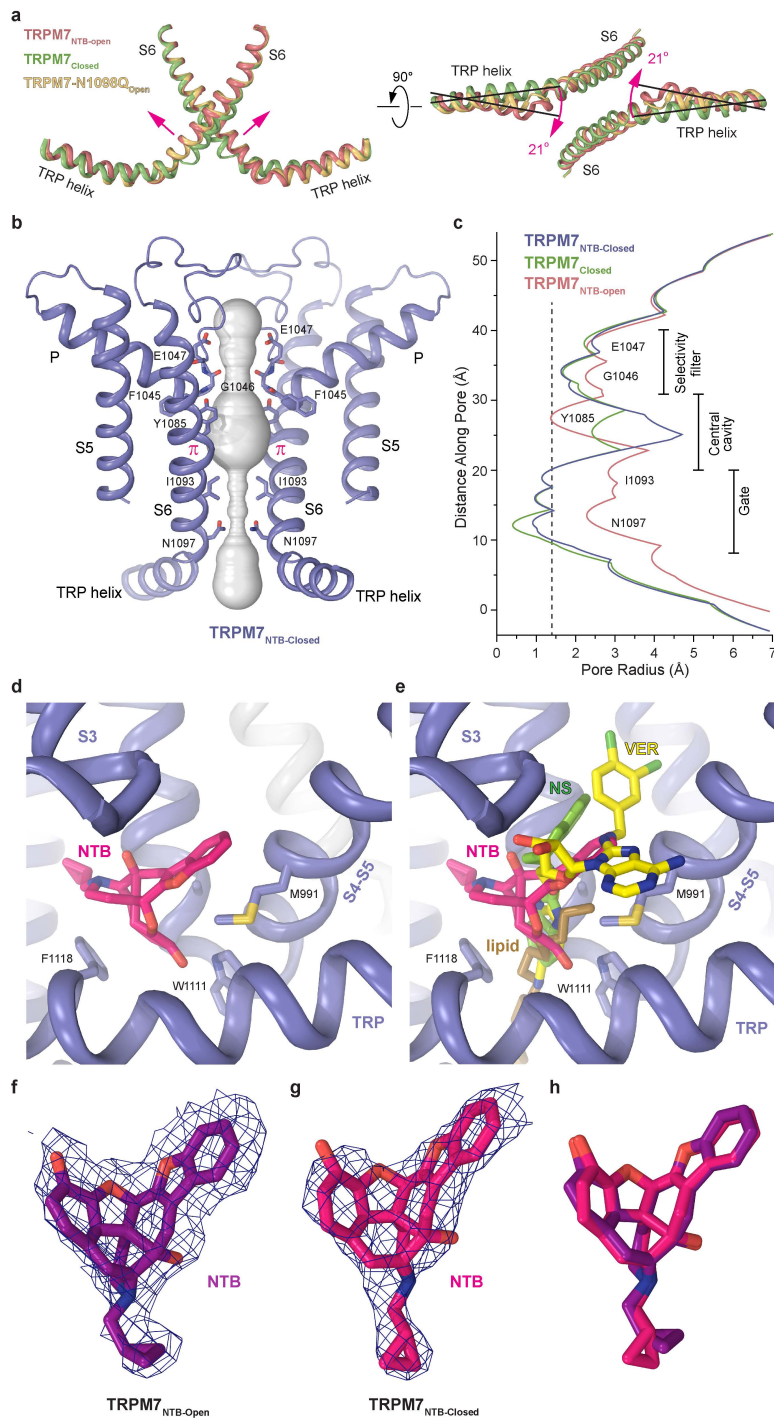

**Supplementary Fig. 8 | Conformational changes in the pore domain of TRPM7<sub>NTB-open</sub> and naltriben binding to the vanilloid-like site in TRPM7<sub>NTB-closed</sub>.** **a** Superposition of S6 and TRP helices for two diagonal subunits in TRPM7<sub>NTB-open</sub> (red), TRPM7<sub>Closed</sub> (green) and TRPM7-N1098Q<sub>open</sub> (yellow), with the other two subunits removed for clarity. Pink arrows indicate domain movements between TRPM7<sub>Closed</sub> and TRPM7<sub>NTB-open</sub>. **b** Pore-forming domain in TRPM7<sub>NTB-Closed</sub> with the residues contributing to pore lining shown as sticks. Only two of four subunits are shown, with the front and back subunits omitted for clarity. The pore profile is shown as a space-filling model (grey). The  $\pi$ -bulge in the middle of S6 is labeled. **c** Pore radius for TRPM7<sub>NTB-Closed</sub> (purple), TRPM7<sub>Closed</sub> (green) and TRPM7<sub>NTB-open</sub> (red) calculated using HOLE. The vertical dashed line denotes the radius of a water molecule, 1.4 Å. **d** Close-up view of the vanilloid-like site in TRPM7<sub>NTB-Closed</sub>, with the molecule of NTB shown in sticks (pink). **e** The same region of TRPM7<sub>NTB-Closed</sub> as in (d), with the molecules of VER155008 from TRPM7<sub>VER-Closed</sub> (yellow), NS8593 from TRPM7<sub>NS-Closed</sub> (green) and the lipid (brown) from TRPM7<sub>Closed</sub> superposed. **f-g** Representative densities (blue mesh) for naltriben (NTB) in TRPM7<sub>NTB-Open</sub> (f) and TRPM7<sub>NTB-Closed</sub> (g). **h** Superposed NTB molecules from TRPM7<sub>NTB-Open</sub> (purple) and TRPM7<sub>NTB-Closed</sub> (pink) shown in sticks.

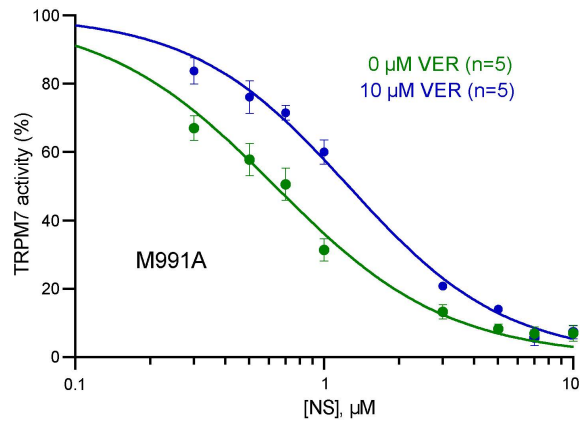

**Supplementary Fig. 9 | Competition of the NS8593 and VER155009 inhibitors for the same binding site.** Concentration dependencies of NS8593 inhibition for TRPM7-M991A in the absence and presence of 10  $\mu\text{M}$  VER155009, assessed using the  $\text{Ca}^{2+}$  influx assay. Curves through the points (mean  $\pm$  SEM) are logistic equation fits.  $n$ , the number of independent measurements. The values of  $IC_{50}$  and  $n_{\text{Hill}}$  are provided in **Supplementary Table 4**. Source data are provided. Note: the control data for TRPM7-M991A (without VER155008) were taken from experiments illustrated in **Fig. 6g**.



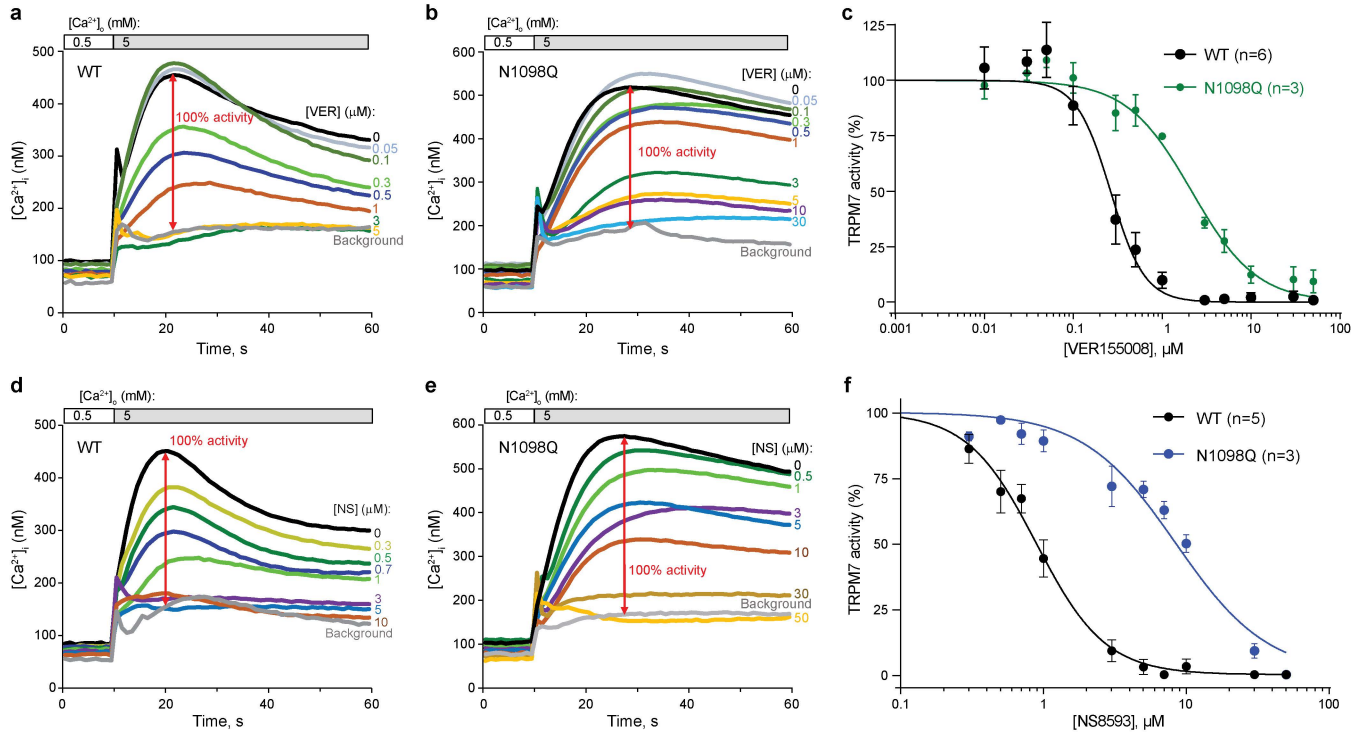

**Supplementary Fig. 10 | Inhibition of wild-type and N1098Q TRPM7 by VER155008 and NS8593.** **A-b** Representative  $Ca^{2+}$  uptake traces for wild-type (WT) (**a**) and mutant N1098Q (**b**) TRPM7 at different concentrations of VER155008. **c** Concentration-dependencies of WT and N1098Q TRPM7 inhibition by VER155008 measured using traces illustrated in (**a-b**). Curves through the points (mean  $\pm$  SEM) are logistic equation fits, with the values of  $IC_{50}$  and  $n_{Hill}$  provided in **Supplementary Table 4**.  $n$ , the number of independent measurements. Source data are provided. **d-e** Representative  $Ca^{2+}$  uptake traces for WT (**d**) and N1098Q mutant (**e**) TRPM7 at different concentrations of NS8593. **f** Concentration-dependencies of WT and N1098Q TRPM7 inhibition by NS8593 measured using traces illustrated in (**d-e**). Curves through the points (mean  $\pm$  S.E.M.) are logistic equation fits, with the values of  $IC_{50}$  and  $n_{Hill}$  provided in **Supplementary Table 4**.  $n$ , the number of independent measurements. Source data are provided.

**Supplementary Table 1 | Cryo-EM data collection, refinement, and validation statistics.**

| <b>Structure</b>                          | <b>TRPM7<sup>closed</sup></b> | <b>TRPM7</b>     | <b>TRPM7-N1098Q<sup>open</sup></b> | <b>TRPM7<sup>NTB-open</sup></b> | <b>TRPM7<sup>NTB-closed</sup></b> |
|-------------------------------------------|-------------------------------|------------------|------------------------------------|---------------------------------|-----------------------------------|
| Preparation                               | MSP2N2                        | GDN              | GDN                                | MSP2N2                          | MSP2N2                            |
| Ligand                                    | apo                           | apo              | apo                                | Naltriben                       | Naltriben                         |
| EMDB accession code                       | EMDB-40496                    | EMDB-40497       | EMDB-40498                         | EMDB-40499                      | EMDB-40500                        |
| PDB accession code                        | 8SI2                          | 8SI3             | 8SI4                               | 8SI5                            | 8SI6                              |
| <b>Data collection</b>                    |                               |                  |                                    |                                 |                                   |
| Magnification                             | 105,000x                      | 105,000x         | 105,000x                           | 105,000x                        | 105,000x                          |
| Voltage (kV)                              | 300                           | 300              | 300                                | 300                             | 300                               |
| Electron exposure (e-/Å <sup>2</sup> )    | 58                            | 58               | 58                                 | 58                              | 58                                |
| Defocus range (µm)                        | -0.5 to -1.5                  | -0.5 to -1.5     | -0.5 to -1.5                       | -0.5 to -1.5                    | -0.5 to -1.5                      |
| Reported pixel size (Å)                   | 0.83                          | 0.83             | 0.83                               | 0.83                            | 0.83                              |
| Calibrated pixel size (Å)                 | 0.83                          | 0.83             | 0.83                               | 0.83                            | 0.83                              |
| Exposures (no.)                           | 5,087                         | 9,822            | 5,521                              | 5,738                           | 5,738                             |
| <b>Processing</b>                         |                               |                  |                                    |                                 |                                   |
| Platform software for particle picking    | CryoSPARC v3.3.2              | CryoSPARC v3.3.2 | CryoSPARC v3.3.2                   | CryoSPARC v3.3.2                | CryoSPARC v3.3.2                  |
| Motion correction                         | MotionCor2                    | Patch Motion     | MotionCor2                         | MotionCor2                      | MotionCor2                        |
| CTF estimation                            | Patch CTF                     | Patch CTF        | Patch CTF                          | Patch CTF                       | Patch CTF                         |
| Software for 2D/3D class. & refinements   | Relion v4.0, Cryosparc v3.3.2 | Cryosparc v3.3.2 | Relion v4.0, Cryosparc v3.3.2      | Relion v4.0, Cryosparc v3.3.2   | Relion v4.0, Cryosparc v3.3.2     |
| Symmetry imposed                          | C4                            | C4               | C4                                 | C4                              | C4                                |
| Initial particle images (no.)             | 1,336,887                     | 3,033,187        | 1,597,469                          | 1,408,817                       | 1,408,817                         |
| Final particle images (no.)               | 178,432                       | 122,316          | 157,446                            | 134,039                         | 96,984                            |
| Map resolution (Å)                        | 2.19                          | 2.61             | 2.46                               | 2.17                            | 2.44                              |
| FSC 0.143                                 |                               |                  |                                    |                                 |                                   |
| Map resolution range (Å) min/median/max   | 1.92/3.39/33.27               | 1.80/4.56/34.78  | 1.81/5.61/37.99                    | 1.90/3.23/34.27                 | 2.13/4.31/36.47                   |
| <b>Refinement</b>                         |                               |                  |                                    |                                 |                                   |
| Initial models used (PDB code)            | 5zx5                          | This study       | This study                         | This study                      | This study                        |
| Model resolution (Å)                      | 2.19                          | 2.61             | 2.46                               | 2.17                            | 2.44                              |
| FSC threshold                             |                               |                  |                                    |                                 |                                   |
| Map sharpening B factor (Å <sup>2</sup> ) | -66                           | -81              | -67                                | -60                             | -73                               |
| Model composition                         |                               |                  |                                    |                                 |                                   |
| Non-hydrogen atoms                        | 39,022                        | 38,613           | 38,997                             | 38,949                          | 38,649                            |
| Protein residues                          | 4,420                         | 4,420            | 4,420                              | 4,288                           | 4,428                             |
| Ligand atoms                              | 3,310                         | 2,901            | 3,281                              | 3,493                           | 2,865                             |
| R.m.s. deviations                         |                               |                  |                                    |                                 |                                   |
| Bond lengths (Å)                          | 0.009                         | 0.006            | 0.010                              | 0.011                           | 0.008                             |
| Bond angles (°)                           | 1.004                         | 1.135            | 1.354                              | 1.179                           | 0.959                             |
| Validation                                |                               |                  |                                    |                                 |                                   |
| CC (across whole map volume)              | 0.6012                        | 0.5777           | 0.5840                             | 0.5906                          | 0.3510                            |
| CC (only across atoms in the model)       | 0.6991                        | 0.7039           | 0.6829                             | 0.7493                          | 0.7285                            |
| Clashscore, all atoms                     | 2.35                          | 2.78             | 2.97                               | 2.55                            | 1.75                              |
| Poor rotamers (%)                         | 0.20                          | 0.41             | 0.82                               | 0.10                            | 0.00                              |
| Ramachandran plot                         |                               |                  |                                    |                                 |                                   |
| Favored (%)                               | 90.90                         | 90.63            | 87.90                              | 91.96                           | 91.77                             |
| Allowed (%)                               | 8.83                          | 8.74             | 11.37                              | 7.86                            | 7.51                              |
| Disallowed (%)                            | 0.27                          | 0.64             | 0.73                               | 0.18                            | 0.73                              |

Supplementary Table 1 | Cryo-EM data collection, refinement, and validation statistics (continued).

| Structure                                 | TRPM7 <sup>VER-Closed</sup> | TRPM7-N1098Q <sup>VER-Closed</sup> | TRPM7-N1098Q <sup>NS-Closed</sup> | TRPM7 <sup>closed</sup> MHR1-3 |
|-------------------------------------------|-----------------------------|------------------------------------|-----------------------------------|--------------------------------|
| Preparation                               | GDN                         | GDN                                | GDN                               | MSP2N2                         |
| Ligand                                    | VER155008                   | VER155008                          | NS8593                            | apo                            |
| EMDB accession code                       | EMDB-40501                  | EMDB-40502                         | EMDB-40504                        | EMDB-40505                     |
| PDB accession code                        | 8SI7                        | 8SI8                               | 8SIA                              | 8SIB                           |
| <b>Data collection</b>                    |                             |                                    |                                   |                                |
| Magnification                             | 105,000x                    | 105,000x                           | 105,000x                          | 105,000x                       |
| Voltage (kV)                              | 300                         | 300                                | 300                               | 300                            |
| Electron exposure (e-/Å <sup>2</sup> )    | 58                          | 58                                 | 60                                | 58                             |
| Defocus range (µm)                        | -0.5 to -1.5                | -0.5 to -1.5                       | -0.5 to -1.5                      | -0.5 to -1.5                   |
| Reported pixel size (Å)                   | 0.83                        | 0.83                               | 0.428                             | 0.83                           |
| Calibrated pixel size (Å)                 | 0.83                        | 0.83                               | 0.81                              | 0.83                           |
| Exposures (no.)                           | 5,989                       | 4,685                              | 7,659                             | 5,087                          |
| <b>Processing</b>                         |                             |                                    |                                   |                                |
| Platform software for particle picking    | CryoSPARC v3.3.2            | CryoSPARC v3.3.2                   | CryoSPARC v3.3.2                  | CryoSPARC v3.3.2               |
| Motion correction                         | Patch Motion Correction     | MotionCor2                         | MotionCor2                        | MotionCor2                     |
| CTF estimation                            | Patch CTF                   | Patch CTF                          | Patch CTF                         | Patch CTF                      |
| Software for 2D/3D class. & refinements   | Cryosparc v3.3.2            | Relion v4.0, Cryosparc v3.3.2      | Relion v4.0, Cryosparc v3.3.2     | Relion v4.0, Cryosparc v3.3.2  |
| Symmetry imposed                          | C4                          | C4                                 | C4                                | C1                             |
| Initial particle images (no.)             | 1,425,193                   | 1,083,549                          | 1,380,320                         | 1,336,887                      |
| Final particle images (no.)               | 197,764                     | 93,797                             | 139,500                           | 325,415                        |
| Map resolution (Å)                        | 2.59                        | 2.99                               | 2.91                              | 2.62                           |
| FSC 0.143                                 |                             |                                    |                                   |                                |
| Map resolution range (Å) min/median/max   | 2.15/5.45/39.61             | 1.78/6.10/47.22                    | 2.58/6.27/45.38                   | 2.34/3.37/35.65                |
| <b>Refinement</b>                         |                             |                                    |                                   |                                |
| Initial models used (PDB code)            | This study                  | This study                         | This study                        | This study                     |
| Model resolution (Å)                      | 2.59                        | 2.99                               | 2.91                              | 2.62                           |
| FSC threshold                             |                             |                                    |                                   |                                |
| Map sharpening B factor (Å <sup>2</sup> ) | -79                         | -118                               | -101                              | -102                           |
| <b>Model composition</b>                  |                             |                                    |                                   |                                |
| Non-hydrogen atoms                        | 38,761                      | 38,609                             | 38,537                            | 3,544                          |
| Protein residues                          | 4,420                       | 4,420                              | 4,420                             | 454                            |
| Ligand atoms                              | 3,049                       | 2,893                              | 2,821                             | 0                              |
| <b>R.m.s. deviations</b>                  |                             |                                    |                                   |                                |
| Bond lengths (Å)                          | 0.011                       | 0.010                              | 0.009                             | 0.006                          |
| Bond angles (°)                           | 1.082                       | 1.113                              | 1.402                             | 1.214                          |
| <b>Validation</b>                         |                             |                                    |                                   |                                |
| CC (across whole map volume)              | 0.6004                      | 0.6737                             | 0.6267                            | 0.7279                         |
| CC (only across atoms in the model)       | 0.7259                      | 0.7419                             | 0.6625                            | 0.8001                         |
| Clashscore, all atoms                     | 2.83                        | 3.34                               | 3.52                              | 4.20                           |
| Poor rotamers (%)                         | 0.10                        | 0.41                               | 0.72                              | 0.78                           |
| <b>Ramachandran plot</b>                  |                             |                                    |                                   |                                |
| Favored (%)                               | 90.10                       | 86.60                              | 84.96                             | 85.78                          |
| Allowed (%)                               | 9.17                        | 12.67                              | 14.49                             | 12.89                          |
| Disallowed (%)                            | 0.73                        | 0.73                               | 0.55                              | 1.33                           |



**Supplementary Table 2 | Summary of MD simulations.** The average root-mean-square deviation (r.m.s.d) values with respect to initial structures were calculated for all protein C $\alpha$  atoms (residues 843 to 1147), S1-S6 and TRP helices (residues 853 to 875, 885 to 905, 914 to 943, 958 to 981, 986 to 1022, and 1071 to 1123), and the channel pore only (residues and 1085-1098 and 1045 to 1057).

| System                              | Simulation length, ns | Number of atoms | Equilibrated box size, Å <sup>3</sup> | C $\alpha$ RMSD, Å <sup>2</sup> |                       |              |
|-------------------------------------|-----------------------|-----------------|---------------------------------------|---------------------------------|-----------------------|--------------|
|                                     |                       |                 |                                       | Entire model                    | S1-S6 and TRP helices | Channel pore |
| Simulations with no applied voltage |                       |                 |                                       |                                 |                       |              |
| TRPM7 <sub>Closed</sub> -rep1       | 1050                  | 178521          | 134×137×94                            | 1.94 ± 0.18                     | 1.47 ± 0.15           | 1.08 ± 0.12  |
| TRPM7 <sub>Closed</sub> -rep2       | 1020                  | 178680          | 138×135×93                            | 1.77 ± 0.27                     | 1.31 ± 0.15           | 0.97 ± 0.14  |
| TRPM7 <sub>NTB-Open</sub>           | 808                   | 178443          | 137×136×93                            | 1.53 ± 0.21                     | 0.77 ± 0.06           | 0.63 ± 0.06  |
| TRPM7-N1098Q <sub>Open</sub> -rep1  | 1065                  | 178458          | 135×135×95                            | 2.01 ± 0.29                     | 1.13 ± 0.09           | 0.61 ± 0.07  |
| TRPM7-N1098Q <sub>Open</sub> -rep2  | 1078                  | 178416          | 135×137×94                            | 2.17 ± 0.33                     | 1.17 ± 0.08           | 0.61 ± 0.06  |
| Simulations under 600 mV voltage    |                       |                 |                                       |                                 |                       |              |
| TRPM7-N1098Q <sub>Open</sub> -rep1v | 400                   | 178353          | 131×137×96                            | 2.20 ± 0.62                     | 1.58 ± 0.41           | 0.87 ± 0.28  |
| TRPM7-N1098Q <sub>Open</sub> -rep2v | 300                   | 178404          | 132×136×96                            | 2.66 ± 0.62                     | 1.50 ± 0.38           | 0.58 ± 0.07  |
| TRPM7 <sub>NTB-Open</sub> -rep1v    | 425                   | 178365          | 135×133×96                            | 1.37 ± 0.17                     | 0.78 ± 0.07           | 0.76 ± 0.09  |
| TRPM7 <sub>NTB-Open</sub> -rep2v    | 400                   | 178365          | 135×133×96                            | 1.45 ± 0.26                     | 0.81 ± 0.07           | 0.75 ± 0.11  |

**Supplementary Table 3 | Water permeation and ion conductance in MD simulated structures.** Water permeation and ion conductance were computed using production trajectories of all systems as described in Methods. For the systems with two replicas, the values reported are averages over the two simulations.

| System                                     | Total simulation length, ns | Average water permeation per ns | Average ion conductance, pS |
|--------------------------------------------|-----------------------------|---------------------------------|-----------------------------|
| Simulations with no applied voltage        |                             |                                 |                             |
| TRPM7 <sub>Closed</sub> -rep1 (2 replicas) | 2070                        | 0.13 ± 0.22                     |                             |
| TRPM7-N1098Q <sub>Open</sub> (2 replicas)  | 2143                        | 9.45 ± 1.54                     |                             |
| TRPM7 <sub>NTB-open</sub>                  | 808                         | 7.58 ± 0.53                     |                             |
| Simulations under 600 mV voltage           |                             |                                 |                             |
| TRPM7-N1098Q <sub>Open</sub> (2 replicas)  | 700                         | 16.17 ± 2.29                    | 16.8 ± 7.21                 |
| TRPM7 <sub>NTB-open</sub> (2 replicas)     | 825                         | 14.58 ± 1.36                    | 3.69 ± 0.18                 |

**Supplementary Table 4 |  $EC_{50}$  values for TRPM7 activation by naltriben and  $IC_{50}$  values for TRPM7 inhibition by VER155008 and NS8593. Data are presented as the mean  $\pm$  SEM.**

| TRPM7 variant | Ligand                               | Action     | $EC_{50}$<br>( $\mu$ M) | Hill coefficient | n, independent measurements |
|---------------|--------------------------------------|------------|-------------------------|------------------|-----------------------------|
| WT            | Naltriben                            | agonist    | 65.8 $\pm$ 12.36        | 1.23 $\pm$ 0.25  | 6                           |
| N752K         | Naltriben                            | agonist    | 191.40 $\pm$ 17.96      | 1.91 $\pm$ 0.24  | 3                           |
| L671A         | Naltriben                            | agonist    | 144.5 $\pm$ 22.91       | 1.68 $\pm$ 0.32  | 3                           |
| N752K/ L671A  | Naltriben                            | agonist    | 230.1 $\pm$ 48.93       | 2.82 $\pm$ 1.38  | 4                           |
| S744A         | Naltriben                            | agonist    | 71.8 $\pm$ 9.70         | 1.48 $\pm$ 0.25  | 4                           |
| M741A         | Naltriben                            | agonist    | 85.0 $\pm$ 6.51         | 1.37 $\pm$ 0.11  | 4                           |
| D670A         | Naltriben                            | agonist    | 117.3 $\pm$ 32.36       | 1.17 $\pm$ 0.24  | 3                           |
| TRPM7 variant | Ligand(s)                            | Action     | $IC_{50}$<br>( $\mu$ M) | Hill coefficient | n, independent measurements |
| WT            | VER155008                            | antagonist | 0.23 $\pm$ 0.03         | -2.07 $\pm$ 0.41 | 6                           |
| N1098Q        | VER155008                            | antagonist | 1.71 $\pm$ 0.25         | -1.32 $\pm$ 0.20 | 3                           |
| A981L         | VER155008                            | antagonist | ~25                     |                  | 3                           |
| W1111A        | VER155008                            | antagonist | ~10                     |                  | 3                           |
| WT            | NS8593                               | antagonist | 0.91 $\pm$ 0.08         | -1.73 $\pm$ 0.26 | 5                           |
| N1098Q        | NS8593                               | antagonist | 20.47 $\pm$ 10.7        | -0.93 $\pm$ 0.20 | 3                           |
| A981L         | NS8593                               | antagonist | 11.60 $\pm$ 2.75        | -1.61 $\pm$ 0.45 | 3                           |
| A981V         | NS8593                               | antagonist | 21.91 $\pm$ 12.27       | -1.45 $\pm$ 0.50 | 3                           |
| W1111A        | NS8593                               | antagonist | 5.14 $\pm$ 0.45         | -1.54 $\pm$ 0.24 | 4                           |
| M991A         | NS8593                               | antagonist | 0.59 $\pm$ 0.05         | -1.24 $\pm$ 0.15 | 5                           |
| M991A         | NS8593<br>(+10 $\mu$ M<br>VER155008) | antagonist | 1.28 $\pm$ 0.09         | -1.43 $\pm$ 0.11 | 5                           |

## Reference

80. Henderson, R. et al. Outcome of the first electron microscopy validation task force meeting. *Structure* 20, 205–214 (2012).
